# Supplementary material for: Incorporating nitrogen vacancies in exfoliated B-doped g-C3N4 towards improved photocatalytic ciprofloxacin degradation and hydrogen evolution
Source: Royal Society of Chemistry journal article supplement (doi:10.1039/d1nj05838j), 2022-01-01
Supplement: d1nj05838j1.pdf [file d1nj05838j1.pdf]

## Supporting Information

# Incorporating Nitrogen vacancy in Exfoliated B-Doped g-C<sub>3</sub>N<sub>4</sub> towards Improved Photocatalytic Ciprofloxacin Degradation and Hydrogen Evolution

Lopamudra Acharya, Bhagyashree Priyadarshini Mishra, Sambhu Prasad Pattnaik,

Rashmi Acharya\* and Kulamani Parida\*

*Centre for Nano Science and Nano Technology, ITER,*

*Siksha 'O' Anusandhan deemed to be University, Bhubaneswar, Odisha, India, 751030*

*e-mail: [rashmiacharya@soa.ac.in](mailto:rashmiacharya@soa.ac.in) and [kulamaniparida@soauniversity.ac.in](mailto:kulamaniparida@soauniversity.ac.in)*

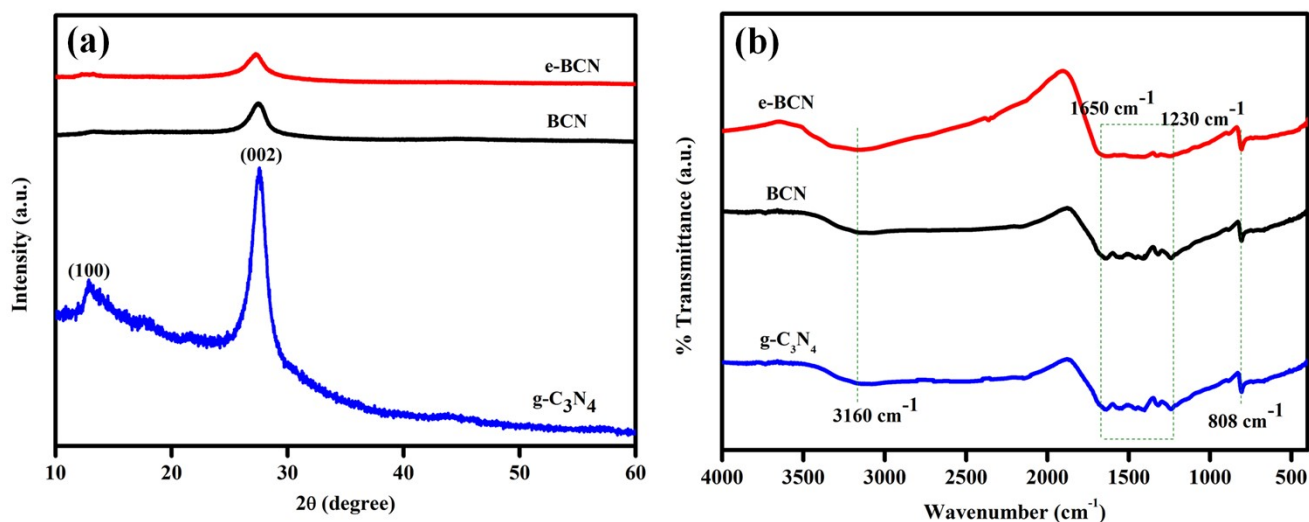

Figure S1 (a) PXRD pattern and (b) FTIR spectra of g-C<sub>3</sub>N<sub>4</sub>, BCN and e-BCN.

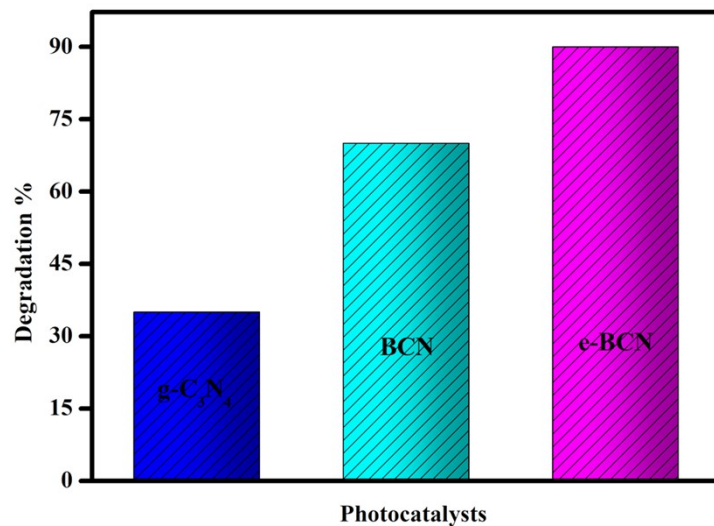

Figure S2 Photocatalytic ciprofloxacin degradation by g-C<sub>3</sub>N<sub>4</sub>, BCN and e-BCN.

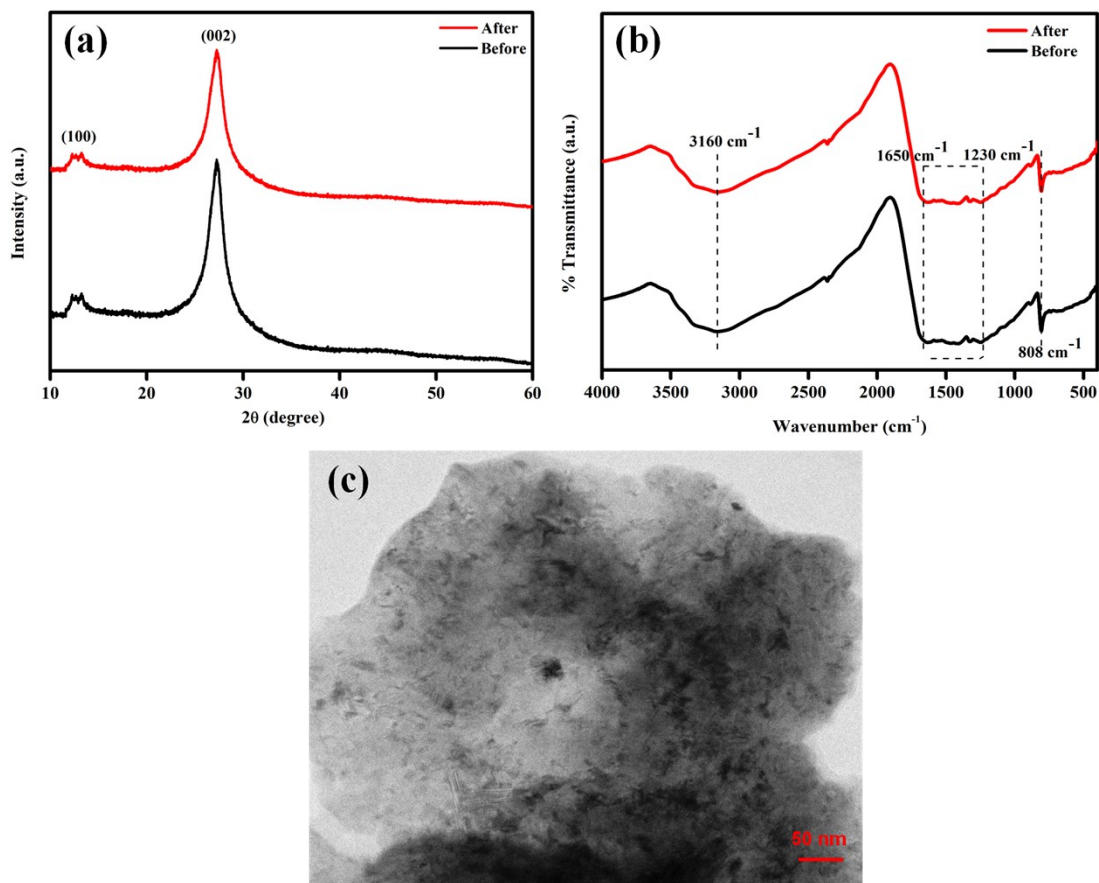

Figure S3 PXRD pattern, FTIR spectra and HRTEM image of BCN and e-BCN.
